# Supplementary material
Source: PubMed Central journal article supplement (PMC2785694)
Supplement: supp_M109.006114_jbc.M109.006114-1.pdf [file supp_M109.006114_jbc.M109.006114-1.pdf]

Fig. S1

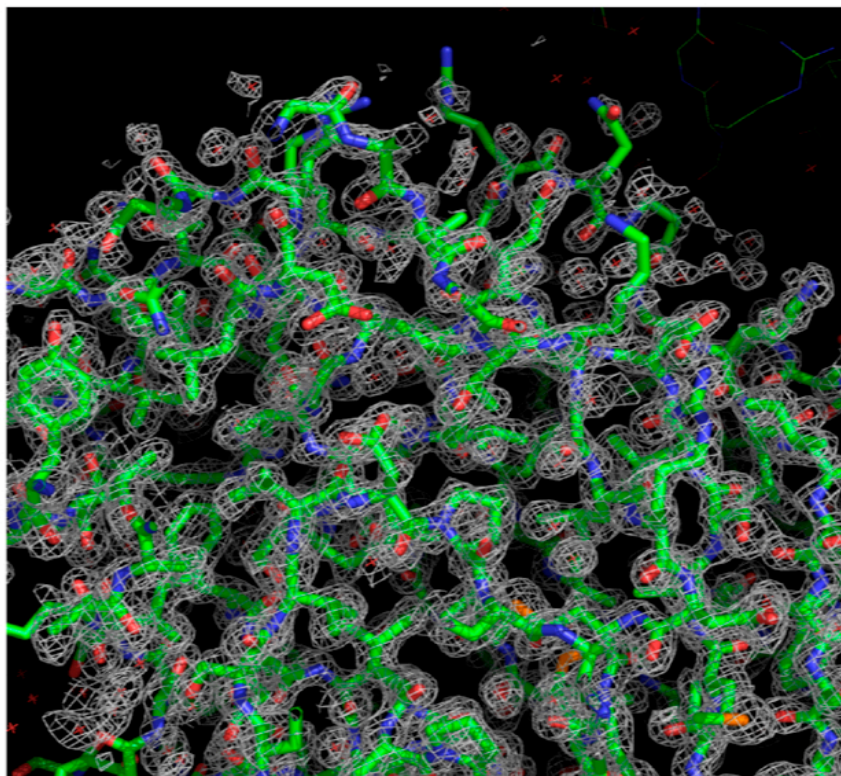

Fig. S1. The final 2fo-fc map at 1.65 Å resolution. The final model included residues 4 to 595, three calcium ions, and 700 water molecules. Using this final model, 2Fo-Fc map was calculated at 1.65 Å resolution.
